# Supplementary material for: Polyacrylonitrile-b-Polystyrene Block Copolymer-Derived Hierarchical Porous Carbon Materials for Supercapacitor
Source: MDPI journal article supplement (doi:10.3390/polym14235109), 2022-11-24
Supplement: s1 [file s1]

### Supporting information

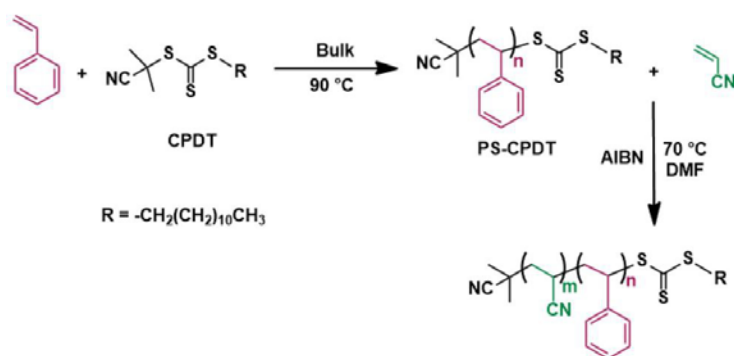

**Scheme S1.** Synthetic route *via* RAFT polymerization for the obtention of PS-*b*-PAN block copolymer.

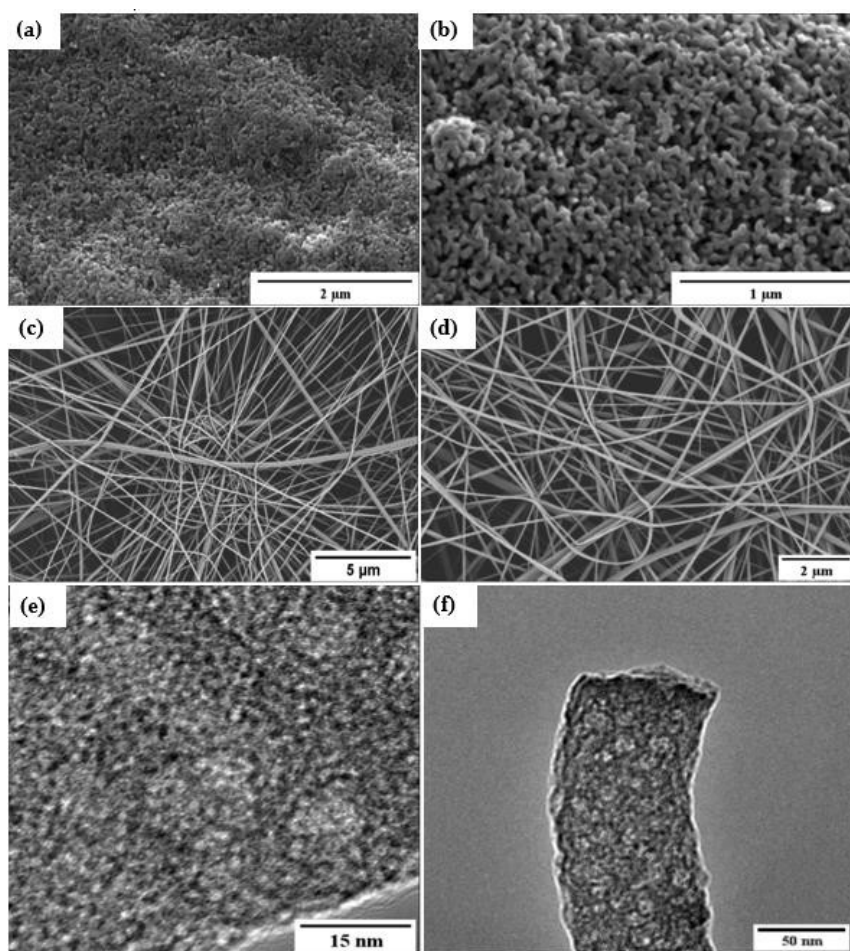

**Figure S1.** (a) and (b) Supplemental SEM images of bulk material after carbonization, (c) and (d) electrospun PS-*b*-PAN fibers, (e) and (f) TEM images of the porous carbon fiber.

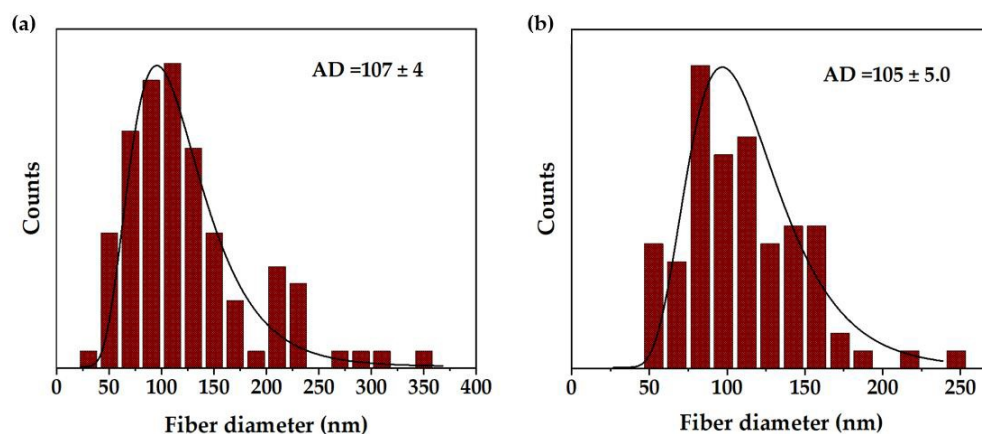

**Figure S2.** Diameter distribution of fibers (a) before and (b) after carbonization.

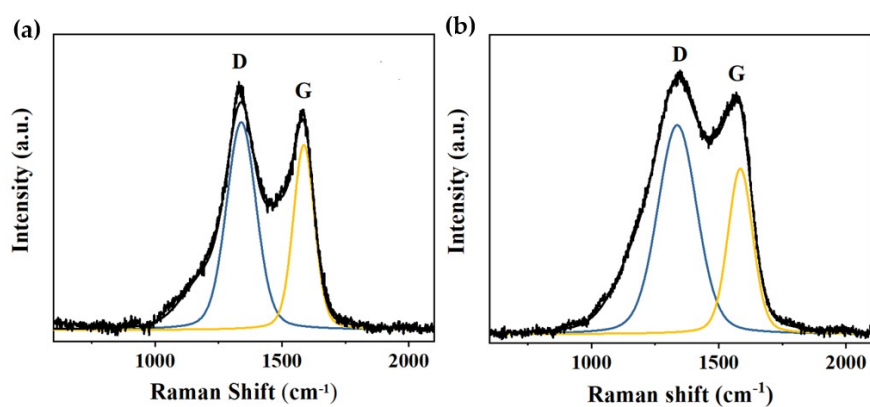

**Figure S3.** Deconvolution of RAMAN spectra of (a) fiber and (b) bulk material.

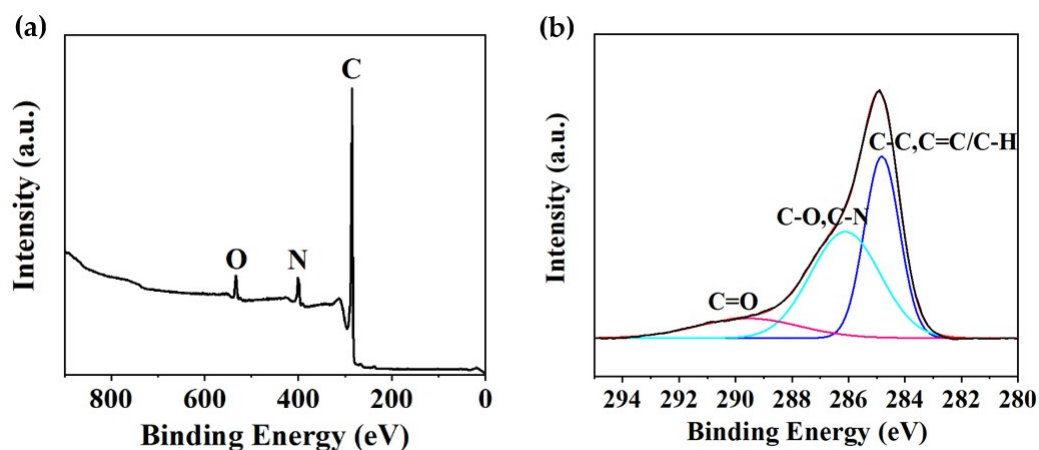

**Figure S4.** (a) XPS full spectrum and (b) High-resolution XPS spectra showing C1s peaks in XPS of carbon porous fiber.

**Table S1.** Relative surface contents of nitrogen and oxygen species determined from N1s and O1s peaks in XPS spectra.

| Specie | Content (%) |
|--------|-------------|
| N      | 7.37        |
| O      | 4.57        |
| C      | 88.06       |
| N-P    | 36.14       |
| N-C=O  | 10.39       |
| N-X    | 45.64       |
| N-O    | 7.79        |
| O-I    | 7.88        |
| O-II   | 36.13       |
| O-III  | 26.93       |
| O-III  | 27.88       |

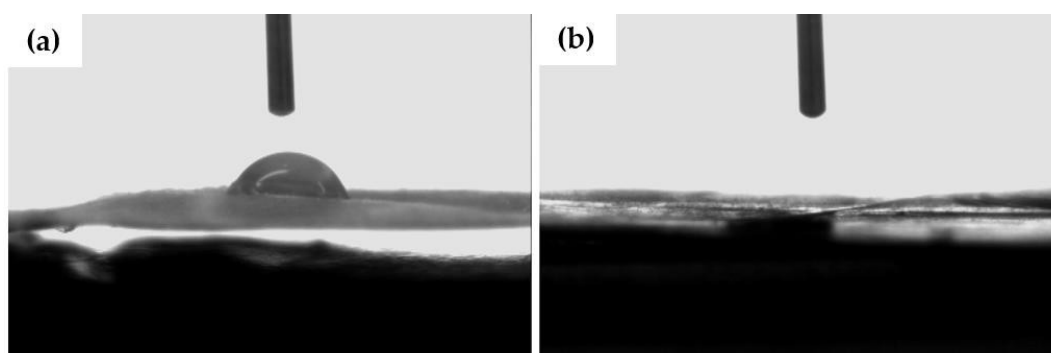

**Figure S5.** Contact angle of the fiber mat (a) before and (b) after carbonization.

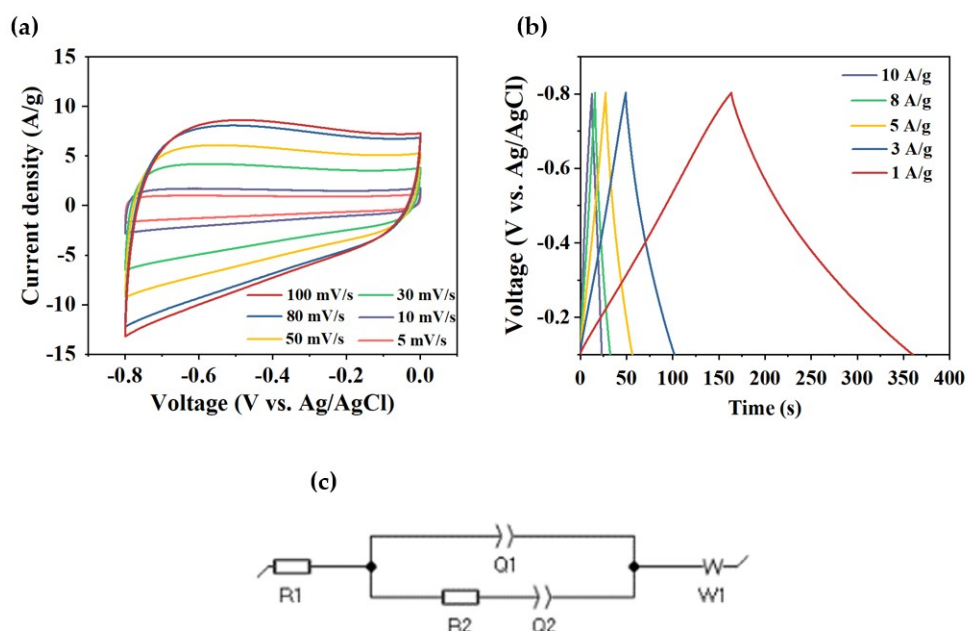

**Figure S6.** (a) CVs of the fiber electrode at scan rates of 5–100 mV s<sup>-1</sup>, (b) GCD curves at different current densities of the carbon fiber electrode, and (c) Equivalent circuit used for the EIS fitting data.
